# Supplementary material for: Phenotypic Assessment of Probiotic and Bacteriocinogenic Efficacy of Indigenous LAB Strains from Human Breast Milk
Source: MDPI journal article supplement (doi:10.3390/cimb44020051), 2022-02-01
Supplement: s1 [file s1]

**Table S1.** Details of primers and PCR conditions for amplifying 16S rRNA gene

| Primer name and its target gene | 5'-3' Sequences      | PCR amplification conditions                                                                                                                        |
|---------------------------------|----------------------|-----------------------------------------------------------------------------------------------------------------------------------------------------|
| 27-F target 16S rRNA gene       | AGAGTTTGATCCTGGCTCAG | Denaturation at 94 °C for 5 min followed by 35 cycles of denaturation at 94 °C for 1 min; annealing at 56 °C for 1 S; extension at 72 °C for 3 min. |
| 1492-R target 16S rRNA gene     | GGT TACCTTGTTACGACTT |                                                                                                                                                     |

**Table S2.** Screening of Lactic acid bacteria from the eighty six bacterial strains isolated from 8 lactating mothers breast milk

| Bacterial isolates | Screening test  |                    |               |              |
|--------------------|-----------------|--------------------|---------------|--------------|
|                    | Gram's staining | Endospore staining | Catalase test | Oxidase test |
| BDUMBT01           | +ve rod         | -ve                | +ve           | -ve          |
| BDUMBT02           | +ve rod         | -ve                | +ve           | -ve          |
| BDUMBT03           | +ve cocci       | -ve                | -ve           | +ve          |
| BDUMBT04           | +ve rod         | -ve                | +ve           | -ve          |
| BDUMBT05           | +ve rod         | -ve                | +ve           | -ve          |
| BDUMBT06           | +ve rod         | -ve                | +ve           | -ve          |
| BDUMBT07           | +ve cocci       | -ve                | +ve           | +ve          |
| <b>BDUMBT08</b>    | <b>+ve rod</b>  | <b>-ve</b>         | <b>-ve</b>    | <b>-ve</b>   |
| <b>BDUMBT09</b>    | <b>+ve rod</b>  | <b>-ve</b>         | <b>-ve</b>    | <b>-ve</b>   |
| <b>BDUMBT10</b>    | <b>+ve rod</b>  | <b>-ve</b>         | <b>-ve</b>    | <b>-ve</b>   |
| <b>BDUMBT11</b>    | <b>+ve rod</b>  | <b>-ve</b>         | <b>-ve</b>    | <b>-ve</b>   |
| <b>BDUMBT12</b>    | <b>+ve rod</b>  | <b>-ve</b>         | <b>-ve</b>    | <b>-ve</b>   |
| <b>BDUMBT13</b>    | <b>+ve rod</b>  | <b>-ve</b>         | <b>-ve</b>    | <b>-ve</b>   |
| BDUMBT14           | +ve cocci       | -ve                | +ve           | +ve          |
| BDUMBT15           | +ve cocci       | -ve                | +ve           | +ve          |
| M2001              | +ve rod         | -ve                | -ve           | +ve          |
| M2002              | +ve rod         | -ve                | -ve           | +ve          |
| M2003              | +ve rod         | -ve                | +ve           | -ve          |
| M2004              | +ve rod         | -ve                | -ve           | +ve          |
| M2005              | +ve rod         | -ve                | -ve           | +ve          |
| M2006              | +ve cocci       | -ve                | +ve           | -ve          |
| M2007              | +ve cocci       | -ve                | +ve           | -ve          |
| M2008              | +ve cocci       | -ve                | +ve           | -ve          |
| M2009              | +ve cocci       | -ve                | +ve           | -ve          |
| M2010              | +ve rod         | -ve                | +ve           | -ve          |
| M2011              | +ve cocci       | -ve                | +ve           | -ve          |
| M2012              | +ve rod         | -ve                | +ve           | -ve          |

|              |                |            |            |            |
|--------------|----------------|------------|------------|------------|
| M2013        | +ve cocci      | -ve        | -ve        | +ve        |
| M2101        | +ve rod        | -ve        | +ve        | -ve        |
| M2102        | +ve cocci      | -ve        | +ve        | -ve        |
| M2103        | +ve cocci      | -ve        | +ve        | -ve        |
| M2104        | +ve rod        | -ve        | -ve        | +ve        |
| M2105        | +ve cocci      | -ve        | +ve        | -ve        |
| M2106        | +ve cocci      | -ve        | -ve        | +ve        |
| M2107        | +ve rod        | -ve        | -ve        | +ve        |
| M2108        | +ve cocci      | -ve        | -ve        | +ve        |
| M2109        | +ve cocci      | -ve        | -ve        | +ve        |
| M2110        | +ve cocci      | -ve        | +ve        | +ve        |
| M2111        | +ve cocci      | -ve        | +ve        | +ve        |
| M2201        | +ve rod        | -ve        | -ve        | +ve        |
| M2202        | +ve cocci      | -ve        | -ve        | +ve        |
| M2203        | +ve cocci      | -ve        | -ve        | +ve        |
| M2204        | +ve cocci      | -ve        | +ve        | -ve        |
| M2205        | +ve cocci      | -ve        | +ve        | +ve        |
| M2206        | +ve rod        | -ve        | -ve        | +ve        |
| M2207        | +ve rod        | -ve        | -ve        | +ve        |
| M2208        | +ve rod        | -ve        | -ve        | +ve        |
| M2209        | +ve rod        | -ve        | -ve        | +ve        |
| M2210        | +ve cocci      | -ve        | +ve        | -ve        |
| M2211        | +ve cocci      | -ve        | +ve        | -ve        |
| M2212        | +ve rod        | -ve        | +ve        | +ve        |
| M2213        | +ve cocci      | -ve        | +ve        | -ve        |
| M2301        | +ve rod        | -ve        | +ve        | +ve        |
| M2302        | +ve rod        | -ve        | +ve        | +ve        |
| M2303        | +ve rod        | -ve        | -ve        | +ve        |
| M2304        | +ve rod        | -ve        | +ve        | +ve        |
| M2305        | +ve rod        | -ve        | +ve        | +ve        |
| M2306        | +ve rod        | -ve        | +ve        | +ve        |
| M2307        | +ve cocci      | -ve        | -ve        | +ve        |
| M2308        | +ve cocci      | -ve        | -ve        | +ve        |
| M2309        | +ve rod        | -ve        | -ve        | +ve        |
| M2310        | +ve cocci      | -ve        | -ve        | +ve        |
| M2401        | +ve cocci      | -ve        | +ve        | -ve        |
| M2402        | +ve cocci      | -ve        | +ve        | -ve        |
| <b>M2403</b> | <b>+ve rod</b> | <b>-ve</b> | <b>-ve</b> | <b>-ve</b> |
| M2404        | +ve cocci      | -ve        | +ve        | -ve        |
| M2405        | +ve rod        | -ve        | +ve        | -ve        |
| M2406        | +ve rod        | -ve        | -ve        | +ve        |
| M2407        | +ve rod        | -ve        | +ve        | -ve        |
| M2408        | +ve rod        | -ve        | +ve        | -ve        |
| M2409        | +ve rod        | -ve        | -ve        | +ve        |
| M2501        | +ve rod        | -ve        | +ve        | -ve        |
| M2502        | +ve rod        | -ve        | -ve        | +ve        |
| M2503        | +ve rod        | -ve        | +ve        | -ve        |
| M2504        | +ve rod        | -ve        | +ve        | -ve        |

|       |           |     |     |     |
|-------|-----------|-----|-----|-----|
| M2505 | +ve rod   | -ve | +ve | +ve |
| M2506 | +ve rod   | -ve | +ve | -ve |
| M2507 | +ve rod   | -ve | +ve | -ve |
| M2508 | +ve rod   | -ve | +ve | -ve |
| M2601 | +ve rod   | -ve | +ve | -ve |
| M2602 | +ve rod   | -ve | +ve | -ve |
| M2603 | +ve rod   | -ve | +ve | +ve |
| M2604 | +ve rod   | -ve | +ve | -ve |
| M2605 | +ve rod   | -ve | +ve | +ve |
| M2606 | +ve rod   | -ve | +ve | -ve |
| M2607 | +ve cocci | -ve | -ve | +ve |
